# Supplementary material
Source: HighWire-hosted journal article supplement (https://hw-f5-jim.highwire.org/content/jim-2021-002038)
Supplement: inline-supplementary-material-1 [file inline-supplementary-material-1.pdf]

Supplementary Table 1. The basic characteristics description of included studies

| Study                                   | Interventions                        |                                 | No. of patients |     | Gender (male/female) |       | Age (month)     |                     | Weight (kg)         |                     | Study Design                                        |
|-----------------------------------------|--------------------------------------|---------------------------------|-----------------|-----|----------------------|-------|-----------------|---------------------|---------------------|---------------------|-----------------------------------------------------|
|                                         | DXM                                  | CH                              | DX<br>M         | CH  | DX<br>M              | CH    | DXM             | CH                  | DXM                 | CH                  |                                                     |
| V. M. Yuen <sup>11</sup><br>2017        | Intranasal dexmedetomidine<br>3µg/kg | Oral chloral hydrate<br>50mg/kg | 88              | 108 | 63/2<br>5            | 68/40 | 32.5(2-7<br>9)  | 24(8-70<br>)        | 12(5-22)            | 11.6(7.5-<br>20)    | A randomised<br>controlled trial                    |
| Jason<br>Reynolds <sup>12</sup><br>2016 | Intranasal dexmedetomidine<br>3µg/kg | Oral chloral hydrate<br>50mg/kg | 44              | 41  | 27/1<br>4            | 23/21 | 25.5(22-<br>29) | 23.3(19<br>.5-27.2) | 12.8(11.<br>8-13.9) | 12.3(11.2<br>-13.4) | A prospective,<br>randomized,<br>double-blind trial |
| Jeff Miller <sup>13</sup><br>2016       | Intranasal dexmedetomidine<br>2µg/kg | Oral chloral hydrate<br>70mg/kg | 50              | 50  | 33/1<br>7            | 24/26 | 13.7±<br>8.6    | 13.6±<br>7.6        | 9.5±2.3             | 8.9±2               | a randomized clinical<br>trial                      |
|                                         | Intranasal dexmedetomidine<br>3µg/kg | Oral chloral hydrate<br>70mg/kg | 50              | 50  | 27/2<br>3            | 24/26 | 15.4±<br>8.5    | 13.6±<br>7.6        | 9.7±2.3             | 8.9±2               |                                                     |
| Hakan Gumus <sup>14</sup><br>2015       | Intranasal dexmedetomidine<br>2µg/kg | Oral chloral hydrate<br>50mg/kg | 42              | 36  | 23/1<br>9            | 18/18 | 44.6±<br>20.7   | 47±<br>21.9         | 14.1±<br>3.6        | 14.1±4.2            | A randomized,<br>prospective study                  |

|                                     |                                      |                                  |     |     |           |       |               |                    |                  |               |                                                                 |
|-------------------------------------|--------------------------------------|----------------------------------|-----|-----|-----------|-------|---------------|--------------------|------------------|---------------|-----------------------------------------------------------------|
|                                     | Intranasal dexmedetomidine<br>3µg/kg | Oral chloral hydrate<br>100mg/kg | 42  | 40  | 23/1<br>9 | 21/19 | 45.1±<br>22.3 | 39.4±<br>11.2      | 14.1±<br>4.4     | 13±1.8        |                                                                 |
| Qianzhong<br>Cao <sup>15</sup> 2017 | Intranasal dexmedetomidine<br>2µg/kg | Oral chloral hydrate<br>80mg/kg  | 71  | 70  | 45/2<br>6 | 43/27 | 18±<br>10-25  | 14.5(8.<br>8-23.3) | 10.5(9.5<br>-12) | 10(8-12)      | A randomised<br>controlled trial                                |
| Wenhua<br>Zhang <sup>16</sup> 2016  | Intranasal dexmedetomidine<br>1µg/kg | Oral chloral hydrate<br>25mg/kg  | 50  | 50  | 30/1<br>8 | 19/21 | 3.3±1.6       | 3.8±<br>1.5        | 5.6±1.6          | 6.1±1.6       | prospective,<br>double-blind,<br>randomized controlled<br>trial |
|                                     | Intranasal dexmedetomidine<br>2µg/kg | Oral chloral hydrate<br>25mg/kg  | 50  | 50  | 22/2<br>4 | 19/21 | 3.3±1.5       | 3.8±<br>1.5        | 5.5±1.2          | 6.1±1.6       |                                                                 |
| Jordan Fett <sup>17</sup><br>2017   | Intranasal dexmedetomidine           | Oral chloral hydrate             | 44  | 49  | 20/2<br>4 | 21/28 | 16.2±<br>7.5  | 11.1±<br>5.2       | 9.7±2.3          | 8.3±1.6       | A randomised<br>controlled trial                                |
| VMY Yuen <sup>18</sup><br>2017      | Intranasal dexmedetomidine<br>3µg/kg | Oral chloral hydrate<br>50mg/kg  | 87  | 107 | -         | -     | -             | -                  | -                | -             | double-blinded,<br>randomised controlled<br>trial               |
| Bi L. Li <sup>19</sup> 2018         | Intranasal dexmedetomidine<br>3µg/kg | Oral chloral hydrate<br>50mg/kg  | 78  | 82  | 52/2<br>6 | 59/23 | 31<br>21-48   | 31<br>22-55        | 13<br>10-16      | 12.8<br>10-16 | A randomized<br>controlled trial                                |
| Eun-Young                           | Intranasal dexmedetomidine           | Oral chloral hydrate             | 118 | 118 | 73/4      | 77/41 | 97±           | 87.4±              | 28±              | 26.3±         | A randomized                                                    |

|                                     |                                        |                                        |                                 |     |           |       |                 |               |                |               |                                  |
|-------------------------------------|----------------------------------------|----------------------------------------|---------------------------------|-----|-----------|-------|-----------------|---------------|----------------|---------------|----------------------------------|
| Joo <sup>20</sup> 2020              | 3µg/kg                                 | 50mg/kg                                |                                 |     | 5         |       | 41.8            | 43.9          | 14.2           | 14.8          | controlled trial                 |
| Li Bi-lian <sup>21</sup><br>2013    | Intranasal dexmedetomidine<br>1µg/kg   | Oral chloral hydrate<br>50mg/kg        | 109                             | 107 | 65/4<br>4 | 70/37 | 24.5±<br>15.85  | 23.9±<br>18.7 | 10.98±<br>3.43 | 11.02±<br>4.1 | A randomized<br>controlled trial |
|                                     | Intranasal dexmedetomidine<br>1.5µg/kg | Oral chloral hydrate<br>50mg/kg        | 95                              | 107 | 63/3<br>2 | 70/37 | 27.39±<br>16.75 | 23.9±<br>18.7 | 11.68±<br>3.2  | 11.02±<br>4.1 |                                  |
|                                     | Intranasal dexmedetomidine<br>2µg/kg   | Oral chloral hydrate<br>50mg/kg        | 99                              | 107 | 59/4<br>0 | 70/37 | 25.94±<br>15.55 | 23.9±<br>18.7 | 11.22±<br>3.22 | 11.02±<br>4.1 |                                  |
|                                     | Intranasal dexmedetomidine<br>2.5µg/kg | Oral chloral hydrate<br>50mg/kg        | 92                              | 107 | 60/3<br>2 | 70/37 | 25.53±<br>17.05 | 23.9±<br>18.7 | 10.95±<br>3.5  | 11.02±<br>4.1 |                                  |
|                                     | Intranasal dexmedetomidine<br>3µg/kg   | Oral chloral hydrate<br>50mg/kg        | 99                              | 107 | 57/4<br>2 | 70/37 | 25.43±<br>16.73 | 23.9±<br>18.7 | 11.24±<br>3.32 | 11.02±<br>4.1 |                                  |
|                                     | Ma Lei <sup>22</sup> 2020              | Intranasal dexmedetomidine<br>1.5µg/kg | Oral chloral hydrate<br>50mg/kg | 24  | 23        | -     | -               | 66±<br>34.8   | 61.1±<br>33.6  | 22.9±<br>7.4  |                                  |
| Zhang<br>Xu-feng <sup>23</sup> 2019 | Intranasal dexmedetomidine<br>2µg/kg   | Oral chloral hydrate<br>30~50mg/kg     | 619                             | 289 | -         | -     | -               | -             | -              | -             | A randomized<br>controlled trial |
| Ji Xiang-hua <sup>24</sup>          | Intranasal dexmedetomidine             | Oral chloral hydrate                   | 50                              | 50  | 20/3      | 21/29 | 15.72±          | 16.08±        | 13.11±         | 13.12±        | A randomized                     |

|      |        |          |  |  |   |  |      |       |     |      |                  |
|------|--------|----------|--|--|---|--|------|-------|-----|------|------------------|
| 2018 | 2µg/kg | 100mg/kg |  |  | 0 |  | 8.88 | 11.16 | 6.5 | 7.23 | controlled trial |
|------|--------|----------|--|--|---|--|------|-------|-----|------|------------------|

DXM: dexmedetomidine; CH: chloral hydrate.
